# Supplementary material for: Energy Harvesting Under Dim-Light Condition With Dye-Sensitized and Perovskite Solar Cells
Source: PubMed Central journal article supplement (PMC6465951; doi:10.3389/fchem.2019.00209), 2019-04-09

## *Supplementary Material*

# **Energy Harvesting under Dim-Light condition with Dye-sensitized and Perovskite Solar Cells**

**Sean Sung-Yen Juang<sup>1‡</sup>, Pei-Ying Lin<sup>1‡</sup>, Yu-Chiung Lin<sup>1</sup>, Yu-Sheng Chen<sup>1</sup>, Po-Shen Shen<sup>1</sup>, Pei-Ying Lin<sup>1</sup>, Yu-Ling Guo<sup>2</sup>, Yu-Chun Wu<sup>2</sup>, and Peter Chen<sup>\*1,3,4</sup>**

<sup>1</sup> Department of Photonics, National Cheng Kung University, No.1, University Road, Tainan, 701, Taiwan

<sup>2</sup> Department of Resources Engineering, National Cheng Kung University, No.1, University Road, Tainan, 701, Taiwan

<sup>3</sup> Center for Micro/Nano Science and Technology (CMNST), No.1, University Road, Tainan, 701, Taiwan

<sup>4</sup> Hierarchical Green-Energy Materials (Hi-GEM) Research Center, National Cheng Kung University, No.1, University Road, Tainan, 701, Taiwan

**‡ These authors contributed equally to this work.**

**\* Correspondence:**

Corresponding Author

[petercyc@mail.ncku.edu.tw](mailto:petercyc@mail.ncku.edu.tw)

Table S1. The comparison of photovoltaic parameters for DSCs with and without blocking under layer (UL) measured under 200 lux illumination. Electrolyte contains 0.1 M LiClO<sub>4</sub>, 0.2 M TBP, 0.33 M Co<sup>2+</sup> and 0.05 M Co<sup>3+</sup> complex in MPN.

| Sample     | V <sub>OC</sub> (mV) | J <sub>SC</sub> (μA/cm <sup>2</sup> ) | FF   | PCE (%) |
|------------|----------------------|---------------------------------------|------|---------|
| Without UL | 324                  | 15.6                                  | 0.40 | 3.1     |
| With UL    | 576                  | 17.3                                  | 0.74 | 11.3    |

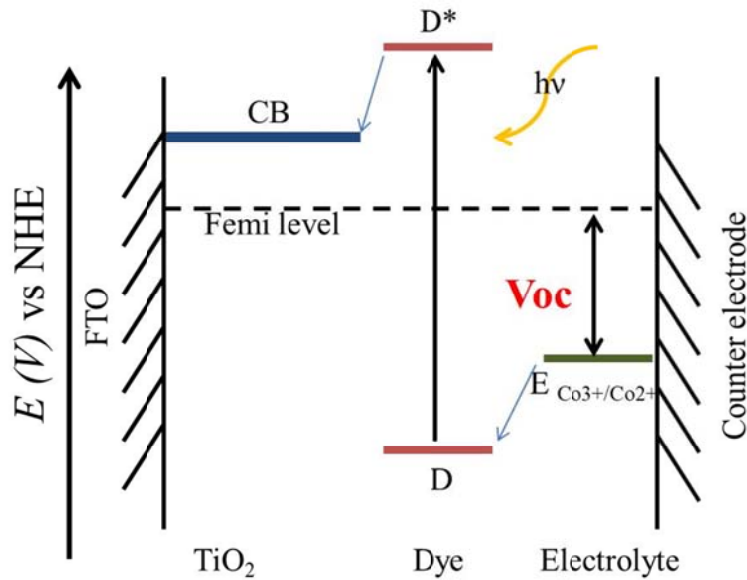

Figure S1. Working principles of a DSC. The open-circuit voltage of the cell is denoted V<sub>OC</sub>.

Table S2. Photovoltaic parameters of cobalt-based DSCs made by different Co<sup>2+</sup> concentrations under 200 lux illumination.

| Sample                  | V <sub>OC</sub> (mV) | J <sub>SC</sub> (μA/cm <sup>2</sup> ) | FF   | PCE (%) |
|-------------------------|----------------------|---------------------------------------|------|---------|
| 0.05 M Co <sup>2+</sup> | 617                  | 21.2                                  | 0.76 | 15.2    |
| 0.15 M Co <sup>2+</sup> | 602                  | 22.1                                  | 0.78 | 15.8    |
| 0.25 M Co <sup>2+</sup> | 585                  | 21.0                                  | 0.76 | 14.3    |

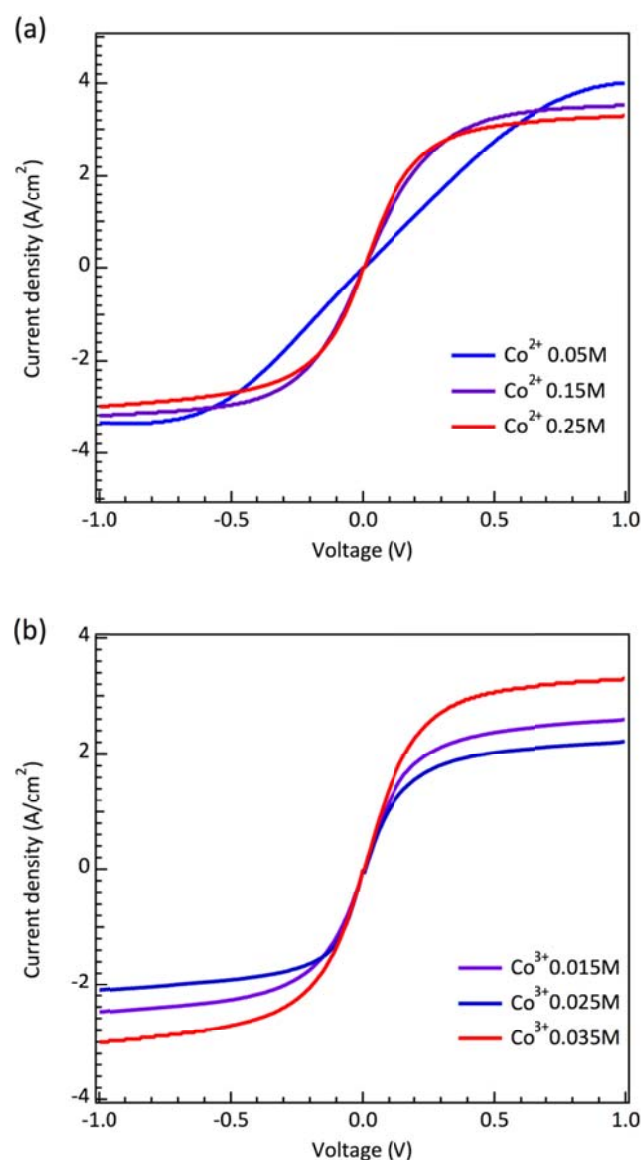

Figure S2. The cyclic voltammetry of dummy cells using different (a) Co<sup>2+</sup> and (b) Co<sup>3+</sup> concentration. The dummy cells were fabricated by two symmetry platinized electrodes, the area of surlyn is 0.36 cm<sup>2</sup>.

Table S3. Photovoltaic parameters of cobalt-based DSCs made by different Co<sup>3+</sup> concentrations under 200 lux illumination.

| Sample | V <sub>OC</sub> (mV) | J <sub>SC</sub> (μA/cm <sup>2</sup> ) | FF | PCE (%) |
|--------|----------------------|---------------------------------------|----|---------|
|--------|----------------------|---------------------------------------|----|---------|

|                          |     |      |      |      |
|--------------------------|-----|------|------|------|
| 0.015 M Co <sup>3+</sup> | 614 | 24.1 | 0.72 | 15.3 |
| 0.025 M Co <sup>3+</sup> | 592 | 23.6 | 0.75 | 15.8 |
| 0.035 M Co <sup>3+</sup> | 585 | 21.0 | 0.76 | 14.3 |

Table S4. Photovoltaic parameters of cobalt-based DSCs made by different Li<sup>+</sup> and TBP concentrations under 200 lux illumination.

| Sample                          | V <sub>OC</sub> (mV) | J <sub>SC</sub> (μA/cm <sup>2</sup> ) | FF   | PCE (%) |
|---------------------------------|----------------------|---------------------------------------|------|---------|
| Lithium-ion free TBP 0.5 M      | 588                  | 20.0                                  | 0.61 | 10.5    |
| Li <sup>+</sup> 0.1 M TBP 0.5 M | 585                  | 21.0                                  | 0.76 | 14.3    |
| Li <sup>+</sup> 0.1 M TBP 0.8 M | 591                  | 20.6                                  | 0.76 | 14.2    |
| Li <sup>+</sup> 0.1 M TBP 1.0 M | 615                  | 19.5                                  | 0.77 | 14.2    |

Figure S3. Equivalent circuit model employed for fitting the EIS spectra of cells.

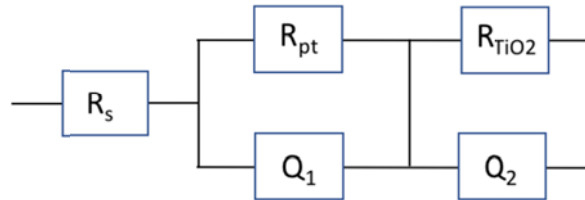

Supplement: Data_Sheet_1.pdf [file Data_Sheet_1.pdf]
